# Supplementary material for: Larval outbreaks in West Greenland: Instant and subsequent effects on tundra ecosystem productivity and CO2 exchange
Source: Springer Nature journal article supplement (doi:10.1007/s13280-016-0863-9), 2017-01-23
Supplement: MOESM1 [file 15654736]

**Ambio**

Electronic Supplementary Materials

*This supplementary material has not been peer reviewed.*

Title: **Larval outbreaks in West Greenland: instant and subsequent effects on tundra ecosystem productivity and CO<sub>2</sub> exchange**

Authors: Magnus Lund, Katrine Raundrup, Andreas Westergaard-Nielsen, Efrén López Blanco, Josephine Nymand, Peter Aastrup

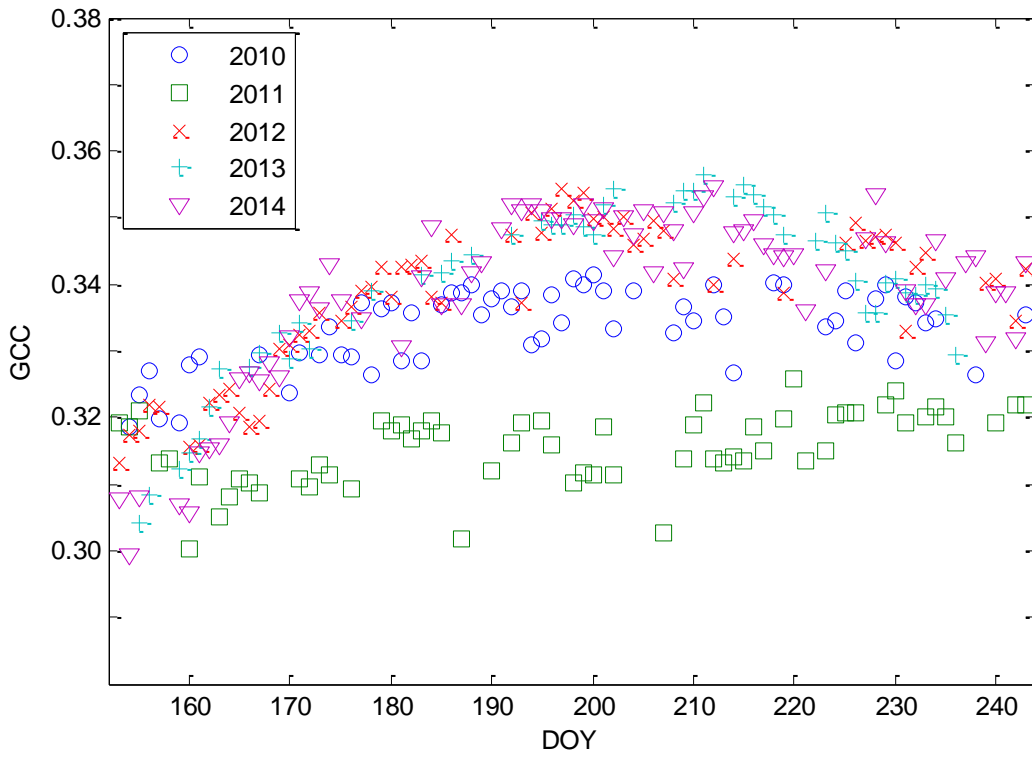

Fig. S1. The green chromatic coordinate (GCC) during June-August (DOY 152-243) in 2010-2014 for the area of the experimental plots (indicated by the red square in Fig. 2), derived from the fixed automatic camera.

Table S1. Estimated parameters from eq. 1 and eq. 2 used to construct time series of gross primary production (GPP) and ecosystem respiration ( $R_{eco}$ ) for the experimental plots in Kobbefjord. Note that in 2011, the green chromatic coordinate (GCC) were used instead of soil temperature (ST) in eq. 1.

| Year | Plot no. | GPP parameterization (eq. 1) |     |      |      |    | $R_{eco}$ parameterization (eq. 2) |      |      |      |    |
|------|----------|------------------------------|-----|------|------|----|------------------------------------|------|------|------|----|
|      |          | a                            | b   | r2   | RMSE | n  | c                                  | d    | r2   | RMSE | n  |
| 2009 | 1        | -145                         | 310 | 0.86 | 146  | 15 | 65                                 | 0.10 | 0.53 | 55   | 15 |
|      | 2        | -183                         | 192 | 0.76 | 287  | 14 | 54                                 | 0.11 | 0.40 | 75   | 14 |
|      | 3        | -63                          | 260 | 0.31 | 123  | 13 | 17                                 | 0.20 | 0.66 | 61   | 13 |
|      | 4        | -                            | -   | -    | -    | -  | 7                                  | 0.30 | 0.93 | 65   | 13 |
|      | 5        | -                            | -   | -    | -    | -  | 53                                 | 0.12 | 0.53 | 76   | 14 |
|      | 6        | -143                         | 33  | 0.59 | 371  | 14 | 53                                 | 0.14 | 0.54 | 108  | 14 |
|      | 7        | -62                          | 391 | 0.69 | 83   | 14 | 30                                 | 0.13 | 0.49 | 37   | 14 |
|      | 8        | -211                         | 509 | 0.76 | 304  | 14 | -                                  | -    | -    | -    | -  |
|      | 9        | -52                          | 89  | 0.46 | 123  | 14 | 14                                 | 0.22 | 0.71 | 67   | 14 |
|      | 10       | -62                          | 47  | 0.32 | 146  | 13 | 23                                 | 0.19 | 0.60 | 91   | 13 |
|      | 11       | -122                         | 199 | 0.54 | 360  | 13 | 40                                 | 0.16 | 0.79 | 66   | 13 |
|      | 12       | -                            | -   | -    | -    | -  | 28                                 | 0.16 | 0.62 | 67   | 14 |
|      | 13       | -36                          | 168 | 0.72 | 55   | 14 | 12                                 | 0.21 | 0.69 | 42   | 14 |
|      | 14       | -202                         | 134 | 0.63 | 392  | 15 | 74                                 | 0.10 | 0.39 | 85   | 15 |
|      | 15       | -47                          | 215 | 0.40 | 99   | 14 | 45                                 | 0.14 | 0.47 | 92   | 14 |
|      | 16       | -65                          | 85  | 0.47 | 149  | 14 | 19                                 | 0.20 | 0.63 | 92   | 14 |
|      | 17       | -56                          | 132 | 0.33 | 149  | 14 | -                                  | -    | -    | -    | -  |
|      | 18       | -                            | -   | -    | -    | -  | 27                                 | 0.16 | 0.69 | 55   | 14 |
| 2010 | 1        | -123                         | 200 | 0.63 | 228  | 17 | 72                                 | 0.11 | 0.66 | 57   | 18 |
|      | 2        | -189                         | 533 | 0.45 | 460  | 17 | 84                                 | 0.10 | 0.42 | 89   | 17 |
|      | 3        | -66                          | 196 | 0.71 | 99   | 17 | 41                                 | 0.14 | 0.49 | 69   | 17 |
|      | 4        | -140                         | 198 | 0.78 | 259  | 17 | 48                                 | 0.17 | 0.81 | 76   | 17 |
|      | 5        | -174                         | 369 | 0.76 | 278  | 15 | 66                                 | 0.13 | 0.63 | 86   | 15 |
|      | 6        | -93                          | 178 | 0.86 | 101  | 17 | 74                                 | 0.11 | 0.64 | 67   | 17 |
|      | 7        | -46                          | 88  | 0.78 | 64   | 18 | 35                                 | 0.14 | 0.85 | 26   | 18 |
|      | 8        | -203                         | 588 | 0.83 | 239  | 16 | 79                                 | 0.09 | 0.40 | 76   | 18 |
|      | 9        | -90                          | 220 | 0.80 | 83   | 17 | 63                                 | 0.13 | 0.66 | 77   | 18 |
|      | 10       | -81                          | 116 | 0.71 | 142  | 17 | 50                                 | 0.15 | 0.79 | 58   | 17 |
|      | 11       | -84                          | 198 | 0.88 | 73   | 15 | 65                                 | 0.11 | 0.63 | 65   | 15 |
|      | 12       | -145                         | 161 | 0.76 | 273  | 17 | 152                                | 0.08 | 0.41 | 131  | 17 |
|      | 13       | -49                          | 139 | 0.76 | 81   | 17 | 64                                 | 0.11 | 0.77 | 36   | 18 |
|      | 14       | -244                         | 682 | 0.64 | 424  | 18 | 79                                 | 0.12 | 0.43 | 115  | 18 |
|      | 15       | -73                          | 163 | 0.39 | 274  | 16 | 61                                 | 0.14 | 0.69 | 74   | 18 |
|      | 16       | -76                          | 125 | 0.77 | 101  | 17 | 46                                 | 0.14 | 0.76 | 53   | 17 |
|      | 17       | -38                          | 94  | 0.34 | 123  | 13 | 34                                 | 0.16 | 0.67 | 70   | 15 |
|      | 18       | -83                          | 617 | 0.82 | 92   | 17 | 109                                | 0.06 | 0.34 | 72   | 17 |
| 2011 | 1        | -84                          | 67  | 0.66 | 114  | 12 | 66                                 | 0.12 | 0.74 | 45   | 14 |
|      | 2        | -                            | -   | -    | -    | -  | 68                                 | 0.09 | 0.43 | 49   | 12 |

|      |    |      |      |      |     |    |     |      |      |     |    |
|------|----|------|------|------|-----|----|-----|------|------|-----|----|
|      | 3  | -97  | 647  | 0.54 | 96  | 13 | 89  | 0.08 | 0.58 | 43  | 14 |
|      | 4  | -122 | 640  | 0.22 | 263 | 10 | 64  | 0.12 | 0.71 | 64  | 11 |
|      | 5  | -    | -    | -    | -   | -  | 121 | 0.06 | 0.41 | 80  | 10 |
|      | 6  | -    | -    | -    | -   | -  | 106 | 0.07 | 0.42 | 65  | 11 |
|      | 7  | -    | -    | -    | -   | -  | 41  | 0.13 | 0.64 | 33  | 12 |
|      | 8  | -    | -    | -    | -   | -  | 36  | 0.18 | 0.65 | 62  | 12 |
|      | 9  | -130 | 693  | 0.36 | 107 | 14 | 55  | 0.14 | 0.83 | 42  | 14 |
|      | 10 | -61  | 75   | 0.37 | 97  | 11 | 65  | 0.11 | 0.71 | 46  | 12 |
|      | 11 | -    | -    | -    | -   | -  | 108 | 0.07 | 0.58 | 56  | 11 |
|      | 12 | -    | -    | -    | -   | -  | -   | -    | -    | -   | -  |
|      | 13 | -30  | 142  | 0.18 | 43  | 13 | 61  | 0.12 | 0.76 | 36  | 14 |
|      | 14 | -110 | 46   | 0.53 | 419 | 11 | 26  | 0.19 | 0.58 | 71  | 12 |
|      | 15 | -147 | 1369 | 0.80 | 57  | 13 | 47  | 0.15 | 0.95 | 22  | 14 |
|      | 16 | -175 | 775  | 0.69 | 60  | 13 | 27  | 0.19 | 0.92 | 32  | 14 |
|      | 17 | -    | -    | -    | -   | -  | 93  | 0.09 | 0.64 | 64  | 12 |
|      | 18 | -133 | 1571 | 0.31 | 147 | 11 | 132 | 0.05 | 0.51 | 46  | 12 |
| 2012 | 1  | -193 | 368  | 0.86 | 197 | 17 | 84  | 0.12 | 0.57 | 104 | 17 |
|      | 2  | -239 | 245  | 0.87 | 282 | 17 | 152 | 0.06 | 0.25 | 131 | 17 |
|      | 3  | -113 | 129  | 0.75 | 127 | 16 | 97  | 0.10 | 0.77 | 59  | 16 |
|      | 4  | -    | -    | -    | -   | -  | 200 | 0.07 | 0.52 | 107 | 15 |
|      | 5  | -    | -    | -    | -   | -  | 95  | 0.12 | 0.45 | 106 | 12 |
|      | 6  | -    | -    | -    | -   | -  | 102 | 0.11 | 0.75 | 72  | 15 |
|      | 7  | -83  | 244  | 0.70 | 138 | 16 | 103 | 0.06 | 0.27 | 80  | 16 |
|      | 8  | -333 | 257  | 0.84 | 472 | 17 | 122 | 0.09 | 0.60 | 91  | 17 |
|      | 9  | -113 | 105  | 0.63 | 147 | 15 | 126 | 0.09 | 0.42 | 117 | 15 |
|      | 10 | -139 | 318  | 0.26 | 328 | 15 | 119 | 0.09 | 0.38 | 127 | 15 |
|      | 11 | -153 | 162  | 0.72 | 262 | 11 | 135 | 0.08 | 0.26 | 88  | 11 |
|      | 12 | -    | -    | -    | -   | -  | 257 | 0.06 | 0.51 | 99  | 14 |
|      | 13 | -73  | 71   | 0.71 | 142 | 16 | 148 | 0.05 | 0.32 | 71  | 17 |
|      | 14 | -276 | 294  | 0.89 | 294 | 14 | 130 | 0.09 | 0.53 | 104 | 14 |
|      | 15 | -    | -    | -    | -   | -  | 94  | 0.12 | 0.45 | 131 | 14 |
|      | 16 | -118 | 111  | 0.65 | 163 | 15 | 57  | 0.14 | 0.56 | 105 | 15 |
|      | 17 | -90  | 145  | 0.71 | 226 | 11 | 13  | 0.25 | 0.61 | 134 | 12 |
|      | 18 | -103 | 153  | 0.48 | 217 | 14 | 116 | 0.08 | 0.39 | 71  | 14 |
| 2013 | 1  | -188 | 175  | 0.82 | 230 | 16 | 65  | 0.14 | 0.70 | 77  | 16 |
|      | 2  | -481 | 758  | 0.94 | 299 | 15 | 31  | 0.23 | 0.66 | 158 | 16 |
|      | 3  | -143 | 64   | 0.77 | 124 | 15 | 68  | 0.15 | 0.76 | 89  | 15 |
|      | 4  | -374 | 369  | 0.81 | 478 | 16 | 103 | 0.15 | 0.61 | 200 | 16 |
|      | 5  | -390 | 325  | 0.83 | 470 | 14 | 162 | 0.11 | 0.52 | 203 | 15 |
|      | 6  | -227 | 281  | 0.91 | 191 | 16 | 46  | 0.19 | 0.70 | 137 | 16 |
|      | 7  | -95  | 321  | 0.84 | 104 | 15 | 47  | 0.14 | 0.82 | 37  | 16 |
|      | 8  | -453 | 374  | 0.89 | 499 | 14 | 109 | 0.10 | 0.65 | 89  | 15 |
|      | 9  | -172 | 328  | 0.75 | 142 | 15 | 81  | 0.15 | 0.76 | 102 | 15 |
|      | 10 | -146 | 158  | 0.81 | 134 | 15 | 93  | 0.13 | 0.57 | 138 | 15 |

|      |    |      |     |      |     |    |     |      |      |     |    |
|------|----|------|-----|------|-----|----|-----|------|------|-----|----|
|      | 11 | -264 | 415 | 0.92 | 214 | 15 | 67  | 0.15 | 0.67 | 136 | 15 |
|      | 12 | -397 | 390 | 0.87 | 410 | 15 | 117 | 0.13 | 0.70 | 142 | 16 |
|      | 13 | -86  | 163 | 0.67 | 131 | 15 | 96  | 0.09 | 0.55 | 68  | 16 |
|      | 14 | -427 | 736 | 0.88 | 409 | 15 | 47  | 0.19 | 0.82 | 87  | 15 |
|      | 15 | -95  | 7   | 0.71 | 148 | 16 | 54  | 0.18 | 0.81 | 94  | 16 |
|      | 16 | -164 | 317 | 0.79 | 156 | 15 | 52  | 0.18 | 0.52 | 166 | 15 |
|      | 17 | -121 | 323 | 0.86 | 137 | 15 | 40  | 0.16 | 0.73 | 84  | 15 |
|      | 18 | -147 | 404 | 0.84 | 153 | 15 | 87  | 0.11 | 0.42 | 136 | 15 |
| 2014 | 1  | -223 | 247 | 0.67 | 356 | 15 | 163 | 0.08 | 0.27 | 142 | 15 |
|      | 2  | -331 | 186 | 0.64 | 731 | 16 | 174 | 0.08 | 0.42 | 155 | 16 |
|      | 3  | -159 | 201 | 0.46 | 343 | 13 | 111 | 0.12 | 0.69 | 129 | 13 |
|      | 4  | -340 | 145 | 0.57 | 743 | 12 | 116 | 0.14 | 0.52 | 252 | 12 |
|      | 5  | -371 | 52  | 0.70 | 565 | 12 | 247 | 0.09 | 0.38 | 285 | 12 |
|      | 6  | -237 | 122 | 0.82 | 314 | 13 | 95  | 0.12 | 0.78 | 94  | 13 |
|      | 7  | -114 | 306 | 0.83 | 123 | 16 | 75  | 0.12 | 0.78 | 50  | 16 |
|      | 8  | -506 | 446 | 0.75 | 779 | 15 | 101 | 0.13 | 0.59 | 134 | 15 |
|      | 9  | -144 | 293 | 0.33 | 351 | 16 | 93  | 0.13 | 0.59 | 148 | 16 |
|      | 10 | -152 | 226 | 0.61 | 237 | 12 | 99  | 0.13 | 0.42 | 251 | 13 |
|      | 11 | -231 | 224 | 0.87 | 225 | 13 | 99  | 0.13 | 0.70 | 140 | 13 |
|      | 12 | -349 | 48  | 0.71 | 632 | 12 | 274 | 0.07 | 0.36 | 186 | 12 |
|      | 13 | -112 | 427 | 0.75 | 139 | 15 | 95  | 0.10 | 0.56 | 80  | 16 |
|      | 14 | -319 | 318 | 0.73 | 501 | 15 | 178 | 0.08 | 0.31 | 169 | 16 |
|      | 15 | -120 | 303 | 0.45 | 175 | 15 | 100 | 0.12 | 0.89 | 61  | 15 |
|      | 16 | -136 | 120 | 0.59 | 203 | 13 | 82  | 0.13 | 0.87 | 59  | 13 |
|      | 17 | -111 | 163 | 0.70 | 191 | 13 | 107 | 0.10 | 0.48 | 139 | 13 |
|      | 18 | -144 | 53  | 0.66 | 199 | 11 | 166 | 0.08 | 0.42 | 123 | 11 |

Table S2. Error matrix from the ecosystem classification. The classification is the result of an automated multiresolution segmentation process (eCognition Developer 9.0.2, Trimble) with primary weight on segment size (scale parameter set to 500) as well as shape (set to 0.1) and compactness (set to 0.5). The generated segments were subsequently used as training data (15 segments per class). The classification was based on a supervised maximum likelihood algorithm, trained with aforementioned selected segments. Each class was tested with approx. 30 independent ground control points generated from in-situ registrations (more than 10 control points per class) and visual inspection of the imagery. The high accuracy is due to the limited number of classes, the limited areal coverage, and a significant percentage of the area being covered by user-selected segments.

| Class              | Affected heath | Fen | Bedrock | Water | Non-affected heath |
|--------------------|----------------|-----|---------|-------|--------------------|
| Affected heath     | 29             | 0   | 0       | 0     | 1                  |
| Fen                | 0              | 29  | 0       | 0     | 1                  |
| Bedrock            | 0              | 0   | 28      | 0     | 2                  |
| Water              | 1              | 0   | 0       | 28    | 1                  |
| Non-affected heath | 3              | 0   | 0       | 0     | 27                 |
|                    |                |     |         |       |                    |
| Overall accuracy   | 0.94           |     |         |       |                    |
